# Supplementary material for: Prospective, Comparative Clinical Pilot Study of Cold Atmospheric Plasma Device in the Treatment of Atopic Dermatitis
Source: Research Square preprint supplement (doi:10.21203/rs.3.rs-453127/v1), 2021-04-26
Supplement: Supplementary file 1 [file e19f8394fe6929cb1ed1229a.docx]

**Supplementary Table 1. Investigator’s Global Assessment (IGA) score**

| **Score** | **Grade** | **Description** |
| --- | --- | --- |
| 0 | Clear | No inflammatory signs of atopic dermatitis |
| 1 | Almost clear | Just perceptible erythema, and just perceptible papulation/infiltration |
| 2 | Mild | Mild erythema, and mild papulation/infiltration |
| 3 | Moderate | Moderate erythema, and moderate papulation/infiltration |
| 4 | Severe | Severe erythema, and severe papulation/infiltration |
| 5 | Very Severe | Severe erythema, and severe papulation/infiltration with oozing/crusting |
